# Supplementary material for: Under pressure—exploring partner changes, physiological responses and telomere dynamics in northern gannets across varying breeding conditions
Source: PeerJ journal article supplement (doi:10.7717/peerj.16457), 2023-12-01
Supplement: 83260_Pelletieretal2023_PeerJ_TableS1.pdf [file 83260_Pelletieretal2023_PeerJ_TableS1.pdf]

**TABLE S1.** Summary of the first linear mixed models computed for annual differences calculated for each biomarker studied (log-transformed and standardized). The three first models and null model shown were derived from the following initial equation: biomarker  $\sim$  (1 | ID) + Partnership status  $\times$  Year + Partnership status  $\times$  Breeding stage + Sex. We calculated an Akaike information criterion value corrected for small sample (AICc), and we selected the most parsimonious model including partnership status (first objective of the study) with the lowest AICc. Model including partnership status with unreasonable  $\Delta$ AICc ( $> 2.5$ ) were excluded.

| Biomarkers                   | The three first models and null model (with only ID as a random parameter) | AICc         | $\Delta$ AICc | Weight       |
|------------------------------|----------------------------------------------------------------------------|--------------|---------------|--------------|
| zl TL                        | 1   ID + Yr                                                                | 245.4        | 0.00          | 0.339        |
|                              | 1   ID + Yr + BrSta                                                        | 247.0        | 1.31          | 0.151        |
|                              | <b>1   ID + Yr + PartnStatAft (selected model)</b>                         | <b>247.3</b> | <b>1.97</b>   | <b>0.127</b> |
|                              | 1   ID                                                                     | 286.2        | 40.83         | 0.000        |
| zl TROC                      | 1   ID + Yr + BrSta                                                        | 155.5        | 0.00          | 0.324        |
|                              | 1   ID + Yr                                                                | 157.2        | 1.64          | 0.143        |
|                              | <b>1   ID + Yr + BrSta + PartnStatAft (selected model)</b>                 | <b>158.0</b> | <b>2.49</b>   | <b>0.093</b> |
|                              | 1   ID                                                                     | 174.0        | 18.49         | 0.000        |
| zl OHdG diff                 | 1   ID + Yr                                                                | 139.8        | 0.00          | 0.255        |
|                              | 1   ID                                                                     | 141.0        | 1.27          | 0.135        |
|                              | 1   ID + Yr + BrSta                                                        | 141.4        | 1.69          | 0.110        |
|                              | <b>1   ID + Yr + PartnStatAft (selected model)</b>                         | <b>141.8</b> | <b>2.07</b>   | <b>0.091</b> |
| zl TBARS <sub>t</sub> diff   | 1   ID                                                                     | 163.3        | 0.00          | 0.162        |
|                              | 1   ID + BrSta                                                             | 163.4        | 0.08          | 0.156        |
|                              | <b>1   ID + BrSta + PartnStatAft + BrSta*PartnStatAft (selected model)</b> | <b>164.1</b> | <b>0.76</b>   | <b>0.111</b> |
|                              | 1   ID + Yr                                                                | 165.0        | 1.66          | 0.071        |
| zl TAC diff                  | <b>1   ID + Yr + PartnStatAft + URIC (selected model)</b>                  | <b>128.1</b> | <b>0.00</b>   | <b>0.365</b> |
|                              | 1   ID + Yr + PartnStatAft + Sex + URIC                                    | 130.5        | 2.39          | 0.110        |
|                              | 1   ID + Yr*PartnStatAft + PartnStatAft + URIC                             | 130.8        | 2.64          | 0.098        |
|                              | 1   ID                                                                     | 152.4        | 24.22         | 0.000        |
| zl PI <sub>c</sub> diff      | <b>1   ID (selected model)</b>                                             | <b>129.8</b> | <b>0.00</b>   | <b>0.311</b> |
|                              | 1   ID + Sex                                                               | 131.7        | 1.91          | 0.120        |
|                              | 1   ID + Yr                                                                | 131.8        | 2.08          | 0.110        |
|                              | 1   ID + BrSta                                                             | 132.1        | 2.36          | 0.095        |
| zl PI <sub>p</sub> diff      | <b>1   ID + Yr + PartnStatAft + BrSta (selected model)</b>                 | <b>-37.6</b> | <b>0.00</b>   | <b>0.927</b> |
|                              | 1   ID + Yr + PartnStatAft + BrSta + PartnStat*BrSta                       | -31.3        | 6.31          | 0.039        |
|                              | 1   ID + Yr + PartnStatAft + BrSta + PartnStat*Yr                          | -30.5        | 7.12          | 0.026        |
|                              | 1   ID                                                                     | 52.6         | 10.95         | 0.004        |
| zl $\omega_6/\omega_3c$ diff | 1   ID + Yr + Sex                                                          | 128.0        | 0.00          | 0.281        |
|                              | 1   ID + Yr                                                                | 128.3        | 0.26          | 0.247        |
|                              | <b>1   ID + Yr + PartnStatAft (selected model)</b>                         | <b>130.2</b> | <b>2.14</b>   | <b>0.096</b> |
|                              | 1   ID                                                                     | 136.2        | 8.18          | 0.005        |

Table S1. Continued

| Biomarkers                     | The three first models and null model (with only ID as a random parameter) | AICc         | $\Delta$ AICc | Weight       |
|--------------------------------|----------------------------------------------------------------------------|--------------|---------------|--------------|
| zl $\omega_6/\omega_{3p}$ diff | <b>1   ID (selected model)</b>                                             | <b>62.3</b>  | <b>0.00</b>   | <b>0.285</b> |
|                                | 1   ID + Yr + BrSta                                                        | 63.9         | 1.63          | 0.126        |
|                                | 1   ID + BrSta                                                             | 64.0         | 1.71          | 0.121        |
|                                | 1   ID + Sex                                                               | 64.2         | 1.90          | 0.110        |
| zl HL diff                     | 1   ID + Yr                                                                | 179.4        | 0.00          | 0.358        |
|                                | 1   ID + Yr + Sex                                                          | 181.8        | 2.37          | 0.109        |
|                                | <b>1   ID + Yr + PartnStatAft (selected model)</b>                         | <b>181.8</b> | <b>2.40</b>   | <b>0.108</b> |
|                                | 1   ID                                                                     | 183.0        | 3.60          | 0.059        |
| zl HCT/TP diff                 | <b>1   ID + Yr + BrSta + PartnStatAft (selected model)</b>                 | <b>163.4</b> | <b>0.00</b>   | <b>0.293</b> |
|                                | 1   ID + Yr + BrSta                                                        | 164.2        | 0.82          | 0.194        |
|                                | 1   ID + Yr + BrSta + PartnStatAft + PartnStatAft*Yr                       | 165.6        | 2.23          | 0.096        |
|                                | 1   ID                                                                     | 182.2        | 18.77         | 0.000        |
| rzl BM diff                    | <b>1   ID + BrSta + PartnStatAft (selected model)</b>                      | <b>133.2</b> | <b>0.00</b>   | <b>0.280</b> |
|                                | 1   ID + BrSta                                                             | 134.4        | 1.21          | 0.153        |
|                                | 1   ID + BrSta + PartnStatAft + Sex                                        | 135.6        | 2.47          | 0.081        |
|                                | 1   ID                                                                     | 135.7        | 2.57          | 0.077        |
| rzl BMvar diff                 | <b>1   ID + Yr + PartnStatAft (selected model)</b>                         | <b>106.8</b> | <b>0.00</b>   | <b>0.353</b> |
|                                | 1   ID + Yr + PartnStatAft + BrSta + PartnStatAft*BrSta                    | 108.7        | 1.88          | 0.138        |
|                                | 1   ID + Yr + PartnStatAft + PartnStatAft*Yr                               | 109.2        | 2.37          | 0.108        |
|                                | 1   ID                                                                     | 109.4        | 2.63          | 0.095        |
| zl GLU diff                    | 1   ID + Yr + BrSta                                                        | 171.2        | 0.00          | 0.233        |
|                                | <b>1   ID + Yr + BrSta + PartnStatAft (selected model)</b>                 | <b>172.3</b> | <b>1.12</b>   | <b>0.133</b> |
|                                | 1   ID + Yr + BrSta + Sex                                                  | 172.3        | 1.12          | 0.133        |
|                                | 1   ID                                                                     | 186.3        | 15.12         | 0.000        |
| rzl TRIG diff                  | 1   ID + BrSta                                                             | 151.4        | 0.00          | 0.238        |
|                                | <b>1   ID + BrSta + PartnStatAft (selected model)</b>                      | <b>152.5</b> | <b>1.07</b>   | <b>0.140</b> |
|                                | 1   ID + BrSta + Yr                                                        | 153.1        | 1.67          | 0.103        |
|                                | 1   ID                                                                     | 154.4        | 2.99          | 0.053        |
| zl BHB diff                    | <b>1   ID + BrSta + Yr (selected model)</b>                                | <b>114.9</b> | <b>0.00</b>   | <b>0.170</b> |
|                                | 1   ID                                                                     | 115.3        | 0.33          | 0.144        |
|                                | 1   ID + BrSta                                                             | 115.7        | 0.78          | 0.115        |
|                                | 1   ID + Yr                                                                | 116.3        | 1.34          | 0.087        |
| zl TP diff                     | <b>1   ID + Yr + BrSta + PartnStatAft (selected model)</b>                 | <b>163.1</b> | <b>0.00</b>   | <b>0.219</b> |
|                                | 1   ID + Yr + PartnStatAft                                                 | 164.1        | 0.98          | 0.134        |
|                                | 1   ID + Yr + BrSta + PartnStatAft + PartnStatAft*Yr                       | 164.5        | 1.41          | 0.108        |
|                                | 1   ID                                                                     | 178.5        | 15.39         | 0.000        |

Table S1. Continued

| Biomarkers   | The three first models and null model (with only ID as a random parameter) | AICc         | $\Delta$ AICc | Weight       |
|--------------|----------------------------------------------------------------------------|--------------|---------------|--------------|
| zl ALB diff  | <b>1   ID + Yr + PartnStatAft (selected model)</b>                         | <b>164.4</b> | <b>0.00</b>   | <b>0.155</b> |
|              | 1   ID + Yr                                                                | 164.7        | 0.23          | 0.138        |
|              | 1   ID + Yr + PartnStatAft + PartnStatAft*Yr                               | 165.6        | 1.11          | 0.089        |
|              | 1   ID                                                                     | 168.4        | 3.99          | 0.021        |
| zl GLOB diff | <b>1   ID + Yr + BrSta + PartnStatAft (selected model)</b>                 | <b>165.1</b> | <b>0.00</b>   | <b>0.229</b> |
|              | 1   ID + Yr + PartnStatAft                                                 | 166.2        | 1.18          | 0.127        |
|              | 1   ID + Yr + BrSta + PartnStatAft + PartnStatAft*Yr                       | 166.9        | 1.87          | 0.090        |
|              | 1   ID                                                                     | 181.3        | 15.21         | 0.000        |
| zl A/G diff  | 1   ID + Yr                                                                | 170.3        | 0.00          | 0.181        |
|              | 1   ID + Yr + BrSta                                                        | 170.6        | 0.29          | 0.157        |
|              | <b>1   ID + Yr + PartnStatAft (selected model)</b>                         | <b>170.9</b> | <b>0.62</b>   | <b>0.133</b> |
|              | 1   ID                                                                     | 177.3        | 7.06          | 0.005        |
| zl URIC diff | 1   ID + Yr                                                                | 167.4        | 0.00          | 0.406        |
|              | <b>1   ID + Yr + PartnStatAft (selected model)</b>                         | <b>169.7</b> | <b>2.36</b>   | <b>0.125</b> |
|              | 1   ID + Yr + Sex                                                          | 169.9        | 2.52          | 0.115        |
|              | 1   ID                                                                     | 177.1        | 9.72          | 0.003        |
| zl CK diff   | 1   ID + Yr                                                                | 148.0        | 0.00          | 0.289        |
|              | <b>1   ID + Yr + PartnStatAft (selected model)</b>                         | <b>148.8</b> | <b>0.82</b>   | <b>0.192</b> |
|              | 1   ID + Yr + Sex                                                          | 150.1        | 2.14          | 0.099        |
|              | 1   ID                                                                     | 163.9        | 15.90         | 0.000        |

**LEGEND:** z, standardized data; l, log-transformed data; r: residuals used; TL, relative telomere length (T/S ratio); TROC, annual telomere rate of change; OHdG, plasma 8-hydroxy-2'-deoxyguanosine concentration; TBARSt, plasma thiobarbituric acid reactive substances divided by plasma triglycerides concentration; TAC, total antioxidant capacity of plasma; Pl<sub>c</sub>, peroxidation index in blood cells; Pl<sub>p</sub>, peroxidation index in plasma;  $\omega_6/\omega_3_c$ , omega-6/omega-3 ratio in blood cells;  $\omega_6/\omega_3_p$ , omega-6/omega-3 ratio in plasma; BM, body mass; BMvar: body mass variation during the breeding season; HL, heterophils:lymphocytes ratio; HCT/TP, hematocrit divided by plasma total protein concentration; GLU, plasma glucose concentration; TRIG, plasma triglycerides concentration; BHB, plasma beta-hydroxybutyrate concentration; TP, plasma total protein concentration; ALB, plasma albumin concentration; GLOB, plasma globulin concentration; A/G, albumin/globulin ratio in plasma; URIC, plasma uric acid concentration; CK, plasma creatine kinase activity.
