# Supplementary material for: Under pressure—exploring partner changes, physiological responses and telomere dynamics in northern gannets across varying breeding conditions
Source: PeerJ journal article supplement (doi:10.7717/peerj.16457), 2023-12-01
Supplement: 83260_Pelletieretal2023_PeerJ_TableS2.pdf [file 83260_Pelletieretal2023_PeerJ_TableS2.pdf]

| INDEPENDENT VARIABLE                                                                                                        | PREDICTOR              | ESTIMATE ± S.E.     | t-VALUE (df)      | P-VALUE      | EFFECT SIZE (Cohen's d) |
|-----------------------------------------------------------------------------------------------------------------------------|------------------------|---------------------|-------------------|--------------|-------------------------|
|  zITROC<br>(R <sup>2</sup> = 0.34)           | Intercept              | -0.14 ± 0.43        | -0.32 (33)        | 0.753        |                         |
|                                                                                                                             | PartnStatRet           | 0.07 ± 0.27         | 0.24 (16)         | 0.812        | 0.12                    |
|                                                                                                                             | BrStatInc              | <b>0.86 ± 0.42</b>  | <b>2.06 (34)</b>  | <b>0.047</b> | <b>0.70</b>             |
|                                                                                                                             | Yr2019                 | <b>-1.89 ± 0.28</b> | <b>-6.69 (12)</b> | <b>0.000</b> | <b>-3.86</b>            |
|  zIOHdGdiff<br>(R <sup>2</sup> = 0.10)      | Intercept              | -0.25 ± 0.46        | -0.56 (37)        | 0.579        |                         |
|                                                                                                                             | PartnStatRet           | 0.31 ± 0.43         | 0.72 (37)         | 0.478        | 0.24                    |
|                                                                                                                             | Yr2019                 | <b>0.84 ± 0.42</b>  | <b>2.00 (37)</b>  | <b>0.049</b> | <b>0.66</b>             |
|  zITBARStdifff<br>(R <sup>2</sup> = 0.13)   | Intercept              | 1.40 ± 0.75         | 1.89 (42)         | 0.066        |                         |
|                                                                                                                             | PartnStatRet           | <b>-1.82 ± 0.89</b> | <b>-2.05 (42)</b> | <b>0.047</b> | <b>-0.63</b>            |
|                                                                                                                             | BrStatInc              | <b>-2.08 ± 0.82</b> | <b>-2.54 (42)</b> | <b>0.015</b> | <b>-0.78</b>            |
|                                                                                                                             | PartnStatRet:BrStatInc | 1.98 ± 0.99         | 1.99 (42)         | 0.053        | 0.61                    |
|  zITACdiff<br>(R <sup>2</sup> = 0.54)      | Intercept              | <b>-1.83 ± 0.42</b> | <b>-4.34 (35)</b> | <b>0.000</b> |                         |
|                                                                                                                             | PartnStatRet           | <b>0.92 ± 0.37</b>  | <b>2.48 (35)</b>  | <b>0.020</b> | <b>0.84</b>             |
|                                                                                                                             | Yr2019                 | <b>1.59 ± 0.41</b>  | <b>3.92 (35)</b>  | <b>0.000</b> | <b>1.32</b>             |
|                                                                                                                             | zIURICdiff             | <b>0.41 ± 0.14</b>  | <b>2.87 (35)</b>  | <b>0.007</b> | <b>0.97</b>             |
|  zIPIcdiff<br>(R <sup>2</sup> = 0.00)     | Intercept              | <b>0.55 ± 0.20</b>  | <b>2.62 (37)</b>  | <b>0.013</b> |                         |
|  zIPIpdiff<br>(R <sup>2</sup> = 0.40)     | Intercept              | 1.36 ± 0.66         | 2.06 (11)         | 0.064        |                         |
|                                                                                                                             | PartnStatRet           | 0.39 ± 0.60         | 0.65 (11)         | 0.530        | 0.39                    |
|                                                                                                                             | Yr2019                 | -0.67 ± 0.56        | -1.19 (11)        | 0.259        | -0.72                   |
|                                                                                                                             | BrStatInc              | -1.26 ± 0.70        | -1.82 (11)        | 0.096        | -1.10                   |
|  zlw6w3cdiff<br>(R <sup>2</sup> = 0.24)   | Intercept              | -0.09 ± 0.41        | -0.22 (36)        | 0.825        |                         |
|                                                                                                                             | PartnStatRet           | 0.33 ± 0.39         | 0.84 (36)         | 0.405        | 0.28                    |
|                                                                                                                             | Yr2019                 | <b>-1.23 ± 0.38</b> | <b>-3.24 (36)</b> | <b>0.003</b> | <b>-1.08</b>            |
|  zlw6w3pdiff<br>(R <sup>2</sup> = 0.02)   | Intercept              | <b>0.58 ± 0.24</b>  | <b>2.43 (18)</b>  | <b>0.026</b> |                         |
|  zIHLdiff<br>(R <sup>2</sup> = 0.11)      | Intercept              | -0.68 ± 0.48        | -1.42 (46)        | 0.163        |                         |
|                                                                                                                             | PartnStatRet           | 0.12 ± 0.43         | 0.28 (46)         | 0.780        | 0.08                    |
|                                                                                                                             | Yr2019                 | <b>1.08 ± 0.44</b>  | <b>2.46 (46)</b>  | <b>0.018</b> | <b>0.73</b>             |
|  rzIHCTTPdiff<br>(R <sup>2</sup> = 0.42)  | Intercept              | <b>1.11 ± 0.53</b>  | <b>2.08 (42)</b>  | <b>0.043</b> |                         |
|                                                                                                                             | PartnStatRet           | 0.72 ± 0.40         | 1.82 (42)         | 0.077        | 0.56                    |
|                                                                                                                             | Yr2019                 | <b>-1.45 ± 0.42</b> | <b>-3.45 (42)</b> | <b>0.001</b> | <b>-1.06</b>            |
|                                                                                                                             | BrStatInc              | <b>-1.23 ± 0.48</b> | <b>-2.57 (42)</b> | <b>0.014</b> | <b>-0.79</b>            |
|  rzIBMdiff<br>(R <sup>2</sup> = 0.16)     | Intercept              | <b>-0.68 ± 0.32</b> | <b>-2.13 (47)</b> | <b>0.038</b> |                         |
|                                                                                                                             | PartnStatRet           | 0.47 ± 0.25         | 1.89 (47)         | 0.064        | 0.55                    |
|                                                                                                                             | BrStatInc              | <b>0.77 ± 0.30</b>  | <b>2.57 (47)</b>  | <b>0.013</b> | <b>0.75</b>             |
|  rzIBMVaridiff<br>(R <sup>2</sup> = 0.39) | Intercept              | <b>-1.30 ± 0.23</b> | <b>-5.59 (23)</b> | <b>0.000</b> |                         |
|                                                                                                                             | PartnStatRet           | <b>0.72 ± 0.19</b>  | <b>3.92 (9)</b>   | <b>0.004</b> | <b>2.62</b>             |
|                                                                                                                             | Yr2019                 | <b>1.20 ± 0.17</b>  | <b>6.87 (7)</b>   | <b>0.000</b> | <b>5.20</b>             |
|  zIGLUdiff<br>(R <sup>2</sup> = 0.35)     | Intercept              | -1.58 ± 0.57        | -2.80 (43)        | 0.008        |                         |
|                                                                                                                             | PartnStatRet           | <b>-0.49 ± 0.42</b> | <b>-1.19 (43)</b> | <b>0.242</b> | -0.36                   |
|                                                                                                                             | Yr2019                 | <b>1.48 ± 0.44</b>  | <b>3.34 (43)</b>  | <b>0.002</b> | <b>1.02</b>             |
|                                                                                                                             | BrStatInc              | <b>1.03 ± 0.51</b>  | <b>2.04 (43)</b>  | <b>0.047</b> | <b>0.62</b>             |
|  rzITRIGdiff<br>(R <sup>2</sup> = 0.13)   | Intercept              | -0.30 ± 0.44        | -0.69 (43)        | 0.495        |                         |
|                                                                                                                             | PartnStatRet           | -0.42 ± 0.35        | -1.18 (43)        | 0.246        | -0.36                   |
|                                                                                                                             | BrStatInc              | <b>0.94 ± 0.42</b>  | <b>2.25 (42)</b>  | <b>0.029</b> | <b>0.69</b>             |
|  zIBHBdiff<br>(R <sup>2</sup> = 0.16)     | Intercept              | 0.22 ± 0.40         | 0.56 (34)         | 0.580        |                         |
|                                                                                                                             | Yr2019                 | <b>-0.73 ± 0.34</b> | <b>-2.16 (15)</b> | <b>0.047</b> | <b>-1.10</b>            |
|                                                                                                                             | BrStatInc              | <b>0.98 ± 0.46</b>  | <b>2.13 (32)</b>  | <b>0.040</b> | <b>0.75</b>             |
|  zITPdiff<br>(R <sup>2</sup> = 0.38)      | Intercept              | -0.58 ± 0.53        | -1.09 (42)        | 0.284        |                         |
|                                                                                                                             | PartnStatRet           | <b>-0.87 ± 0.40</b> | <b>-2.18 (42)</b> | <b>0.035</b> | <b>-0.67</b>            |
|                                                                                                                             | Yr2019                 | <b>1.34 ± 0.42</b>  | <b>3.21 (42)</b>  | <b>0.002</b> | <b>0.99</b>             |
|                                                                                                                             | BrStatInc              | 0.88 ± 0.48         | 1.86 (42)         | 0.070        | 0.57                    |
|  zIALBdiff<br>(R <sup>2</sup> = 0.17)     | Intercept              | 0.36 ± 0.45         | 0.81 (43)         | 0.423        |                         |
|                                                                                                                             | PartnStatRet           | -0.67 ± 0.41        | -1.63 (43)        | 0.111        | -0.50                   |
|                                                                                                                             | Yr2019                 | <b>0.92 ± 0.42</b>  | <b>2.22 (43)</b>  | <b>0.032</b> | <b>0.68</b>             |
|  zIGLOBdiff<br>(R <sup>2</sup> = 0.37)    | Intercept              | -0.75 ± 0.54        | -1.37 (42)        | 0.177        |                         |
|                                                                                                                             | PartnStatRet           | <b>-0.85 ± 0.41</b> | <b>-2.10 (42)</b> | <b>0.042</b> | <b>-0.65</b>            |
|                                                                                                                             | Yr2019                 | <b>1.37 ± 0.43</b>  | <b>3.20 (42)</b>  | <b>0.003</b> | <b>0.99</b>             |
|                                                                                                                             | BrStatInc              | 0.93 ± 0.49         | 1.91 (42)         | 0.063        | 0.59                    |
|  zIAGdiff<br>(R <sup>2</sup> = 0.21)      | Intercept              | 0.46 ± 0.48         | 0.95 (43)         | 0.349        |                         |
|                                                                                                                             | PartnStatRet           | 0.59 ± 0.44         | 1.35 (43)         | 0.184        | 0.41                    |
|                                                                                                                             | Yr2019                 | <b>-1.29 ± 0.45</b> | <b>-2.90 (43)</b> | <b>0.006</b> | <b>-0.89</b>            |
|  zIURICdiff<br>(R <sup>2</sup> = 0.23)    | Intercept              | <b>-0.97 ± 0.48</b> | <b>-2.03 (43)</b> | <b>0.049</b> |                         |
|                                                                                                                             | PartnStatRet           | -0.17 ± 0.43        | -0.39 (43)        | 0.698        | -0.12                   |
|                                                                                                                             | Yr2019                 | <b>1.53 ± 0.44</b>  | <b>3.48 (43)</b>  | <b>0.001</b> | <b>1.06</b>             |
|  zICKdiff<br>(R <sup>2</sup> = 0.34)      | Intercept              | <b>-0.91 ± 0.38</b> | <b>-2.39 (43)</b> | <b>0.021</b> |                         |
|                                                                                                                             | PartnStatRet           | -0.44 ± 0.35        | -1.27 (43)        | 0.210        | -0.39                   |
|                                                                                                                             | Yr2019                 | <b>1.53 ± 0.35</b>  | <b>4.36 (43)</b>  | <b>0.000</b> | <b>1.33</b>             |
