# Supplementary material for: Under pressure—exploring partner changes, physiological responses and telomere dynamics in northern gannets across varying breeding conditions
Source: PeerJ journal article supplement (doi:10.7717/peerj.16457), 2023-12-01
Supplement: 83260_Pelletieretal2023_PeerJ_TableS3.pdf [file 83260_Pelletieretal2023_PeerJ_TableS3.pdf]

**TABLE S3.** Mean  $\pm$  SEM of biomarkers compared between northern gannets that changed or retained their mates in 2017, 2018 and 2019. Results were recorded during the breeding season at Parc national de l'Île-Bonaventure-et-du-Rocher-Percé (Québec, Canada). The sample used to calculate these means is composed of the 38 individuals monitored during two or three years.

| YEARS              |                                              |                           | 2017                       |                             | 2018                        |                             | 2019                        |                             |
|--------------------|----------------------------------------------|---------------------------|----------------------------|-----------------------------|-----------------------------|-----------------------------|-----------------------------|-----------------------------|
| Partnership status |                                              |                           | Changed                    | Retained                    | Changed                     | Retained                    | Changed                     | Retained                    |
| BM                 | Body mass                                    | g                         | 2925 $\pm$ 25<br>(n = 4)   | 2913 $\pm$ 64<br>(n = 13)   | 2760 $\pm$ 61<br>(n = 15)   | 2967 $\pm$ 40<br>(n = 22)   | 3081 $\pm$ 59<br>(n = 15)   | 3047 $\pm$ 49<br>(n = 20)   |
| BMvar              | Body mass variation                          | g.day <sup>-1</sup>       | 2.6 $\pm$ 7.0<br>(n = 4)   | 0.2 $\pm$ 2.7<br>(n = 13)   | -14.9 $\pm$ 1.7<br>(n = 15) | -10.8 $\pm$ 1.4<br>(n = 22) | -0.7 $\pm$ 4.8<br>(n = 13)  | 3.0 $\pm$ 5.4<br>(n = 17)   |
| GLU                | Glucose concentration in plasma              | mmol.L <sup>-1</sup>      | 15.1 $\pm$ 2.7<br>(n = 4)  | 14.4 $\pm$ 0.4<br>(n = 13)  | 12.3 $\pm$ 0.3<br>(n = 14)  | 13.0 $\pm$ 0.3<br>(n = 21)  | 14.1 $\pm$ 0.3<br>(n = 14)  | 14.1 $\pm$ 0.3<br>(n = 17)  |
| TRIG               | Triglycerides concentration in plasma        | mmol.L <sup>-1</sup>      | 0.48 $\pm$ 0.14<br>(n = 4) | 0.53 $\pm$ 0.07<br>(n = 13) | 0.37 $\pm$ 0.04<br>(n = 14) | 0.47 $\pm$ 0.03<br>(n = 21) | 0.64 $\pm$ 0.07<br>(n = 14) | 0.49 $\pm$ 0.03<br>(n = 17) |
| BHB                | Beta-hydroxybutyrate concentration in plasma | mmol.L <sup>-1</sup>      | 0.82 $\pm$ 0.00<br>(n = 4) | 0.97 $\pm$ 0.12<br>(n = 13) | 1.70 $\pm$ 0.21<br>(n = 13) | 1.49 $\pm$ 0.15<br>(n = 20) | 1.36 $\pm$ 0.18<br>(n = 10) | 1.98 $\pm$ 0.25<br>(n = 13) |
| TP                 | Total protein concentration in plasma        | g.L <sup>-1</sup>         | 41.2 $\pm$ 3.7<br>(n = 4)  | 39.4 $\pm$ 1.2<br>(n = 13)  | 37.2 $\pm$ 1.2<br>(n = 14)  | 35.9 $\pm$ 0.8<br>(n = 21)  | 42.1 $\pm$ 1.4<br>(n = 14)  | 41.8 $\pm$ 1.1<br>(n = 17)  |
| ALB                | Albumin concentration in plasma              | g.L <sup>-1</sup>         | 15.7 $\pm$ 0.7<br>(n = 4)  | 14.8 $\pm$ 0.5<br>(n = 13)  | 14.7 $\pm$ 0.6<br>(n = 14)  | 14.8 $\pm$ 0.2<br>(n = 21)  | 16.7 $\pm$ 0.4<br>(n = 14)  | 16.4 $\pm$ 0.4<br>(n = 17)  |
| GLOB               | Globulin concentration in plasma             | g.L <sup>-1</sup>         | 25.5 $\pm$ 3.0<br>(n = 4)  | 24.7 $\pm$ 0.8<br>(n = 13)  | 22.5 $\pm$ 0.7<br>(n = 14)  | 21.1 $\pm$ 0.6<br>(n = 21)  | 25.4 $\pm$ 1.2<br>(n = 14)  | 25.4 $\pm$ 0.9<br>(n = 17)  |
| A/G                | Albumin/globulin ratio in plasma             | -                         | 0.65 $\pm$ 0.05<br>(n = 4) | 0.59 $\pm$ 0.01<br>(n = 13) | 0.65 $\pm$ 0.02<br>(n = 14) | 0.72 $\pm$ 0.02<br>(n = 21) | 0.67 $\pm$ 0.03<br>(n = 14) | 0.65 $\pm$ 0.02<br>(n = 17) |
| URIC               | Uric acid concentration in plasma            | $\mu$ mol.L <sup>-1</sup> | 742 $\pm$ 385<br>(n = 4)   | 1007 $\pm$ 132<br>(n = 13)  | 355 $\pm$ 63<br>(n = 14)    | 630 $\pm$ 70<br>(n = 21)    | 872 $\pm$ 104<br>(n = 14)   | 575 $\pm$ 61<br>(n = 17)    |
| CK                 | Creatine kinase activity in plasma           | U.L <sup>-1</sup>         | 2194 $\pm$ 149<br>(n = 4)  | 1777 $\pm$ 185<br>(n = 13)  | 1129 $\pm$ 307<br>(n = 14)  | 774 $\pm$ 76<br>(n = 21)    | 1029 $\pm$ 183<br>(n = 14)  | 991 $\pm$ 83<br>(n = 17)    |
| HCT                | Hematocrit                                   | %                         | 45.7 $\pm$ 0.2<br>(n = 4)  | 45.6 $\pm$ 0.8<br>(n = 13)  | 47.2 $\pm$ 0.6<br>(n = 16)  | 47.6 $\pm$ 0.4<br>(n = 22)  | 46.4 $\pm$ 0.8<br>(n = 15)  | 48.2 $\pm$ 0.5<br>(n = 20)  |

| YEARS              |                                                                                    |                                         | 2017                   |                         | 2018                    |                         | 2019                     |                          |
|--------------------|------------------------------------------------------------------------------------|-----------------------------------------|------------------------|-------------------------|-------------------------|-------------------------|--------------------------|--------------------------|
| Partnership status |                                                                                    |                                         | Changed                | Retained                | Changed                 | Retained                | Changed                  | Retained                 |
| HCT/TP             | Hematocrit divided by plasma total protein concentration                           | ml erythrocytes.g protein <sup>-1</sup> | 11.2 ± 1.0<br>(n = 4)  | 11.7 ± 0.4<br>(n = 13)  | 12.8 ± 0.5<br>(n = 16)  | 13.5 ± 0.3<br>(n = 22)  | 11.1 ± 0.4<br>(n = 15)   | 11.7 ± 0.4<br>(n = 20)   |
| HL                 | Heterophils:lymphocytes ratio                                                      | -                                       | 1.8 ± 0.9<br>(n = 4)   | 3.1 ± 0.3<br>(n = 13)   | 2.7 ± 0.8<br>(n = 15)   | 1.9 ± 0.2<br>(n = 22)   | 3.7 ± 1.0<br>(n = 13)    | 3.7 ± 0.6<br>(n = 20)    |
| TBARS              | Thiobarbituric acid reactive substances in plasma                                  | μmol.L <sup>-1</sup>                    | 5.5 ± 1.0<br>(n = 4)   | 5.9 ± 0.7<br>(n = 13)   | 5.0 ± 0.6<br>(n = 15)   | 5.5 ± 0.5<br>(n = 21)   | 5.3 ± 0.8<br>(n = 15)    | 4.7 ± 0.6<br>(n = 20)    |
| TBARSt             | Thiobarbituric acid reactive substances concentration corrected for TRIG in plasma | μmol.mmol triglycerides <sup>-1</sup>   | 11.8 ± 1.3<br>(n = 4)  | 12.1 ± 1.6<br>(n = 13)  | 15.6 ± 3.0<br>(n = 14)  | 12.5 ± 1.4<br>(n = 20)  | 9.7 ± 2.2<br>(n = 14)    | 9.4 ± 1.4<br>(n = 17)    |
| OHdG               | 8-hydroxy-2'-deoxyguanosine concentration                                          | ng.mL <sup>-1</sup>                     | 26.5 ± 7.2<br>(n = 4)  | 64.8 ± 17.7<br>(n = 13) | 31.9 ± 5.2<br>(n = 13)  | 52.7 ± 5.7<br>(n = 20)  | 84.0 ± 10.7<br>(n = 11)  | 71.7 ± 10.4<br>(n = 15)  |
| TAC                | Total antioxidant capacity in plasma                                               | mmol.L <sup>-1</sup> Trolox             | 2.9 ± 0.4<br>(n = 4)   | 2.8 ± 0.3<br>(n = 11)   | 1.1 ± 0.2<br>(n = 13)   | 1.4 ± 0.1<br>(n = 21)   | 1.5 ± 0.1<br>(n = 11)    | 1.5 ± 0.1<br>(n = 15)    |
| PI <sub>c</sub>    | Peroxidation index in blood cells                                                  | -                                       | 198 ± 1<br>(n = 4)     | 199 ± 2<br>(n = 13)     | 211 ± 5<br>(n = 12)     | 207 ± 2<br>(n = 20)     | 212 ± 5<br>(n = 8)       | 214 ± 4<br>(n = 14)      |
| PI <sub>p</sub>    | Peroxidation index in plasma                                                       | -                                       | 192 ± 1<br>(n = 3)     | 167 ± 10<br>(n = 13)    | 201 ± 8<br>(n = 8)      | 202 ± 2<br>(n = 12)     | 200 ± 5<br>(n = 2)       | 197 ± 3<br>(n = 8)       |
| ω6/ω3 <sub>c</sub> | Omega-6/omega-3 ratio in blood cells                                               | -                                       | 0.45 ± 0.03<br>(n = 4) | 0.43 ± 0.02<br>(n = 13) | 0.44 ± 0.02<br>(n = 12) | 0.44 ± 0.01<br>(n = 20) | 0.37 ± 0.02<br>(n = 8)   | 0.38 ± 0.01<br>(n = 14)  |
| ω6/ω3 <sub>p</sub> | Omega-6/omega-3 ratio in plasma                                                    | -                                       | 0.27 ± 0.00<br>(n = 3) | 0.29 ± 0.05<br>(n = 13) | 0.36 ± 0.01<br>(n = 8)  | 0.37 ± 0.03<br>(n = 12) | 0.36 ± 0.01<br>(n = 2)   | 0.45 ± 0.04<br>(n = 8)   |
| TL                 | Telomere length in blood cells (T/S ratio)                                         | -                                       | 1.17 ± 0.16<br>(n = 4) | 1.45 ± 0.16<br>(n = 12) | 1.92 ± 0.23<br>(n = 15) | 1.80 ± 0.17<br>(n = 22) | 0.93 ± 0.17<br>(n = 14)  | 0.88 ± 0.06<br>(n = 20)  |
| TROC               | Annual telomere rate of change in blood cells                                      | T/S ratio.yr <sup>-1</sup>              | -                      | -                       | 0.90 ± 0.37<br>(n = 4)  | 0.22 ± 0.23<br>(n = 11) | -1.33 ± 0.32<br>(n = 14) | -1.15 ± 0.29<br>(n = 20) |
